# Prognostic significance of cardiac amyloidosis in patients with aortic stenosis: a systematic review and meta-analysis

Ricci F.<sup>1</sup>; Ceriello L.<sup>2</sup>; Khanij MY.<sup>3</sup>; Dangas G.<sup>4</sup>; Bucciarelli Ducci C.<sup>5</sup>; Di Mauro M.<sup>6</sup>; Fedorowski A.<sup>7</sup>; Zimarino M.<sup>8</sup>; Gallina S.<sup>1</sup>

<sup>1</sup>G. d'Annunzio University, Department of Neuroscience, Imaging and Clinical Sciences, Chieti, Italy

<sup>2</sup>G. D'Annunzio University, Institute of Cardiology and Center of Excellence on Aging, Chieti, Italy

<sup>3</sup>Queen Mary University of London, London, United Kingdom of Great Britain & Northern Ireland

<sup>4</sup>Icahn School of Medicine at Mount Sinai, New York, United States of America

<sup>5</sup>Bristol Heart Institute, Bristol, United Kingdom of Great Britain & Northern Ireland

<sup>6</sup>Maastricht University Medical Centre (MUMC), Maastricht, Netherlands (The)

<sup>7</sup>Lund University, Malmö, Sweden

<sup>8</sup>SS. Annunziata Hospital , Chieti, Italy

**Funding Acknowledgements:** Type of funding sources: None.

**Background:** Cardiac amyloidosis (CA) has been increasingly recognized in elderly patients with aortic stenosis (AS), but with uncertain prognostic significance.

**Objectives:** We performed a systematic review and meta-analysis to clarify whether concurrent CA portends excess mortality in patients with aortic stenosis AS.

**Methods:** Our systematic review of the literature published through June 2020, sought observational studies reporting summary-level outcome data of all-cause mortality in AS patients with or without concurrent CA. Pooled estimate of Mantel-Haenszel odds ratio (OR) and 95% confidence intervals (CIs) for all-cause death was assessed as the primary endpoint. We performed subgroup analysis stratified by severity of left ventricular hypertrophy (LVH) and study-level meta-regression analysis to explore the effect of covariates on summary effect size and to address statistical heterogeneity.

**Results:** We identified 4 studies including 609 AS patients (9% AS-CA; 69% men; age,  $84 \pm 5$  years). The average follow-up was  $20 \pm 5$  months. Compared with lone AS, AS-CA was associated with 2-fold increase in all-cause mortality (pooled OR: 2.30; 95% CI: 1.02-5.18;  $I^2 = 62\%$ ). When analysed according to LVH severity, pooled ORs (95% CI) for all-cause mortality were 1.29 (0.65-2.22) for mild LVH ( $\leq 16$  mm), and 4.81 (2.19-10.56) for moderate/severe LVH ( $>16$  mm). Meta-regression analysis confirmed a stronger relationship proportional to the degree of LVH, regardless of age and aortic valve replacement, explaining between-study heterogeneity variance.

**Conclusions:** CA heralds significantly higher risk of all-cause death in elderly patients with AS. Severity of LVH appears to be a major prognostic determinant in patients with dual AS-CA pathology.

Abstract Figure.

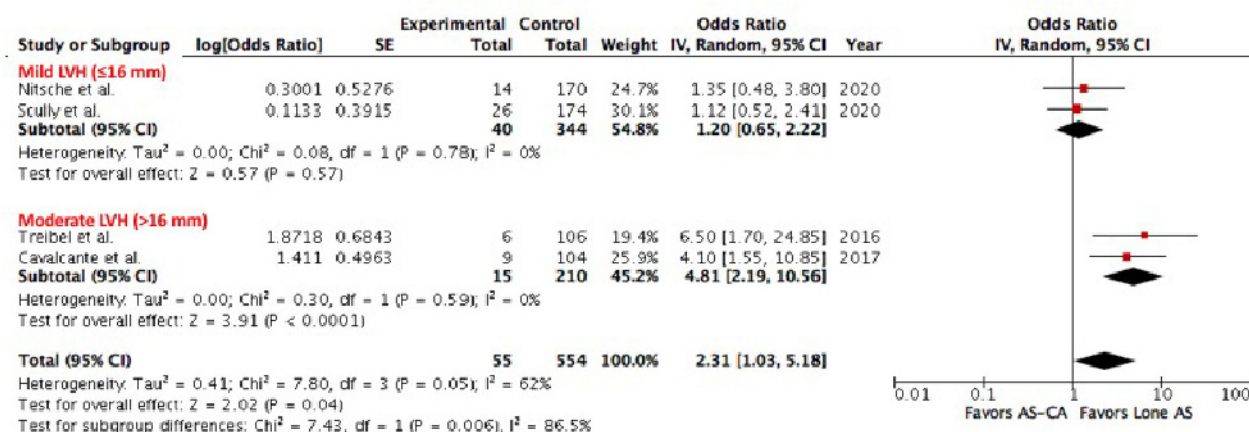

Source: http://academic.oup.com/ehjcimaging/article-pdf/22/Supplement_1/jeaa356.364/36214985/jeaa356.364.pdf
